# Supplementary material
Source: MDPI journal article supplement (https://www.mdpi.com/2313-0105/9/5/270)
Supplement: s1 [file s1 › Supporting Information.pdf]

# Effectively Elevating Ceramic Fillers' Dispersity in Gel Hybrid Electrolyte through Bridge-Linked Construction for High Performance Lithium Metal Batteries

Minghua Chen\*, Wannian Liu, Ziyu Yue, Yang Wang, Yixin Wu, Yu Li, Zhen Chen\*

Key Laboratory of Engineering Dielectric and Applications (Ministry of Education), School of Electrical and Electronic Engineering, Harbin University of Science and Technology, Harbin 150080, P. R. China

\*Correspondence: mhchen@hrbust.edu.cn (M.C.); chen.zhen@hrbust.edu.cn (Z.C.)

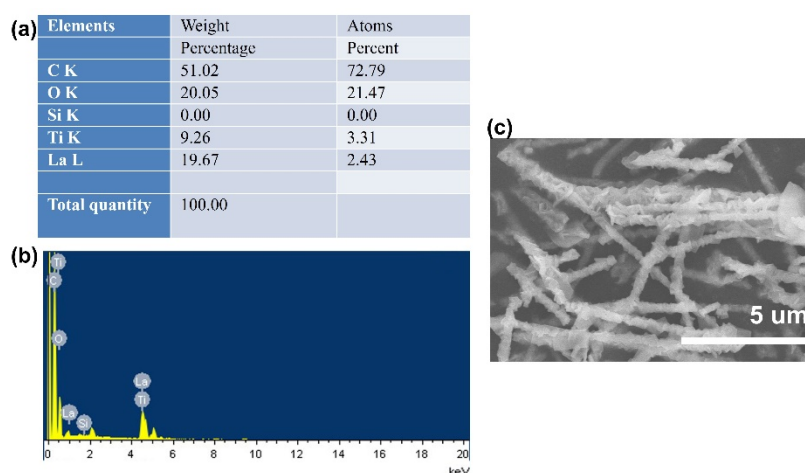

**Figure S1.** (a) EDS results and (b) spectrum of LLTO nanorods shown in a (c) region.

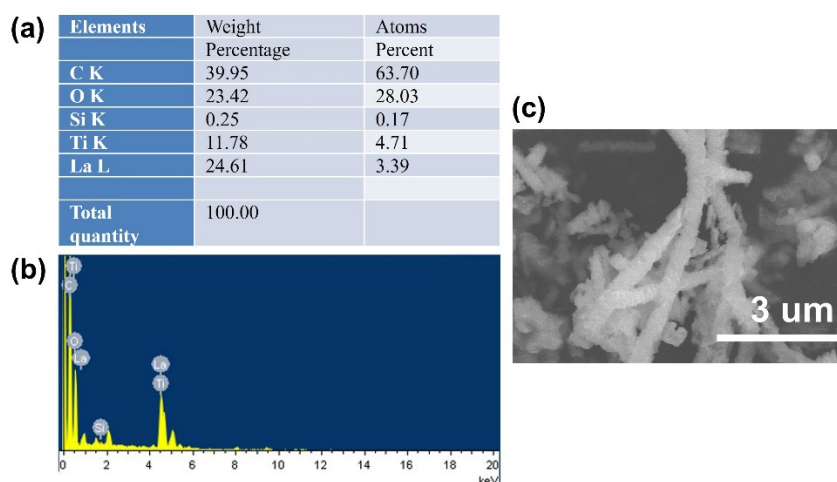

**Figure S2.** (a) EDS results and (b) spectrum of K-LLTO nanorods shown in a (c) region.

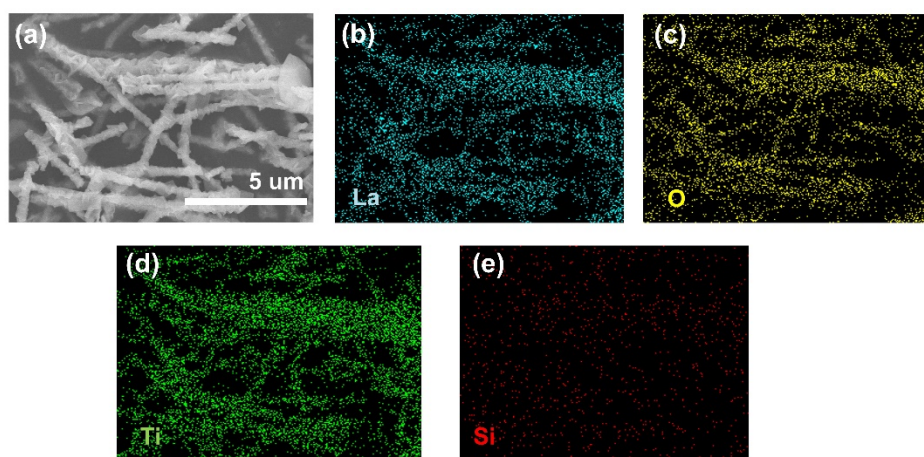

**Figure S3.** (a) SEM image and (b-e) corresponding EDS mappings of (b) La, (c) O, (d) Ti and (e) Si elements of LLTO nanorods.

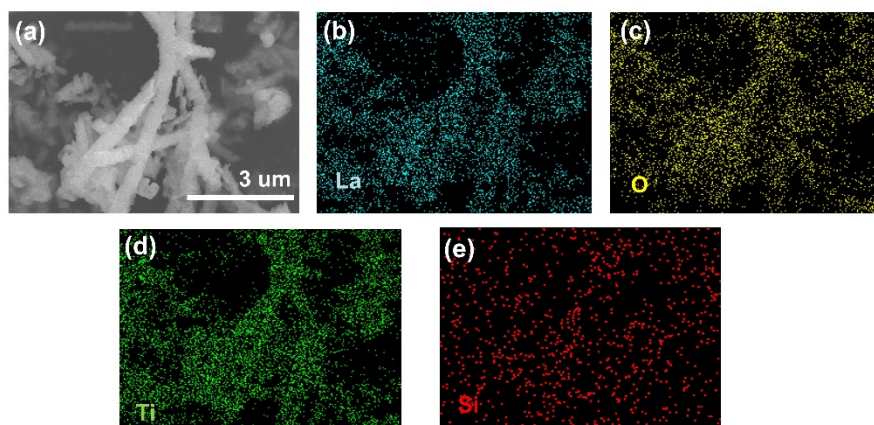

**Figure S4.** (a) SEM image and (b-e) corresponding EDS mappings of (b) La, (c) O, (d) Ti and (e) Si elements of K-LLTO nanorods.

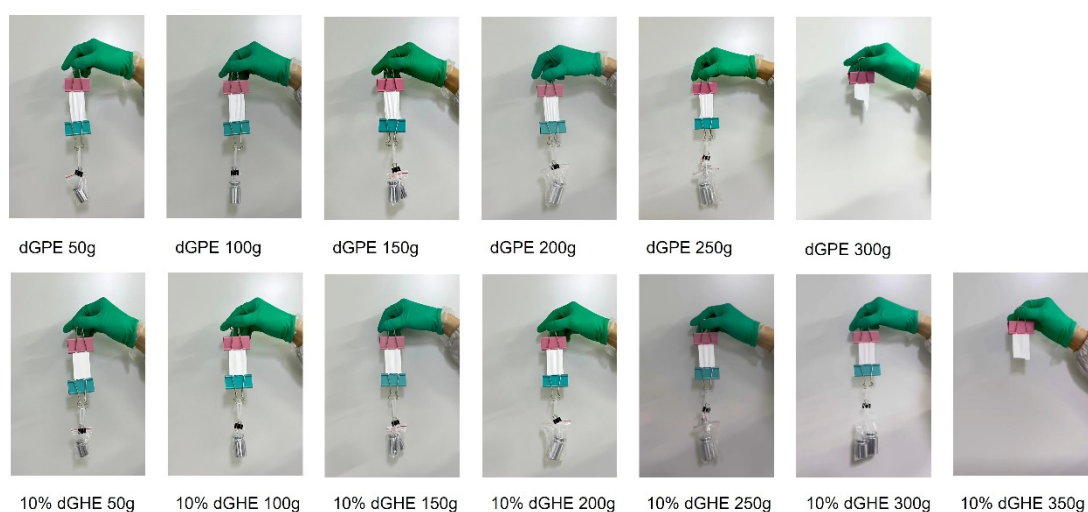

**Figure S5.** Comparative mechanical strength tests of GPE and 10% dGHE.

**Video S1** is attached as Electronic Supplementary Information to qualitatively illustrate the mechanical strength of GPE and 10% dGHE.
